# Supplementary material for: The effect of Fe/Co ratio on the structure and oxygen permeability of Ca-containing composite membranes
Source: Royal Society of Chemistry journal article supplement (doi:10.1039/c9qi00822e), 2019-01-01
Supplement: c9qi00822e1.pdf [file c9qi00822e1.pdf]

## Supporting information

### Effect of Fe/Co ratio on the structure and oxygen permeability of Ca-containing composite membranes

*Shu Wang<sup>a</sup>, Lei Shi<sup>a</sup>, Haoqi Wang<sup>a</sup>, Zhiang Xie<sup>a</sup>, Wen Tan<sup>a</sup>, Yuan He<sup>a</sup>, Dong Yan<sup>a</sup>,  
Mebrouka Boubech<sup>a</sup>, Huixia Luo<sup>a\*</sup>*

<sup>a</sup> School of Material Science and Engineering and Key Lab Polymer Composite & Functional Materials, Sun Yat-Sen University, No. 135, Xingang Xi Road, Guangzhou, 510275, P. R. China

*\*Corresponding author/authors complete details (Telephone; E-mail:)*

*(+0086)-2039386124*

*luohx7@mail.sysu.edu.cn*

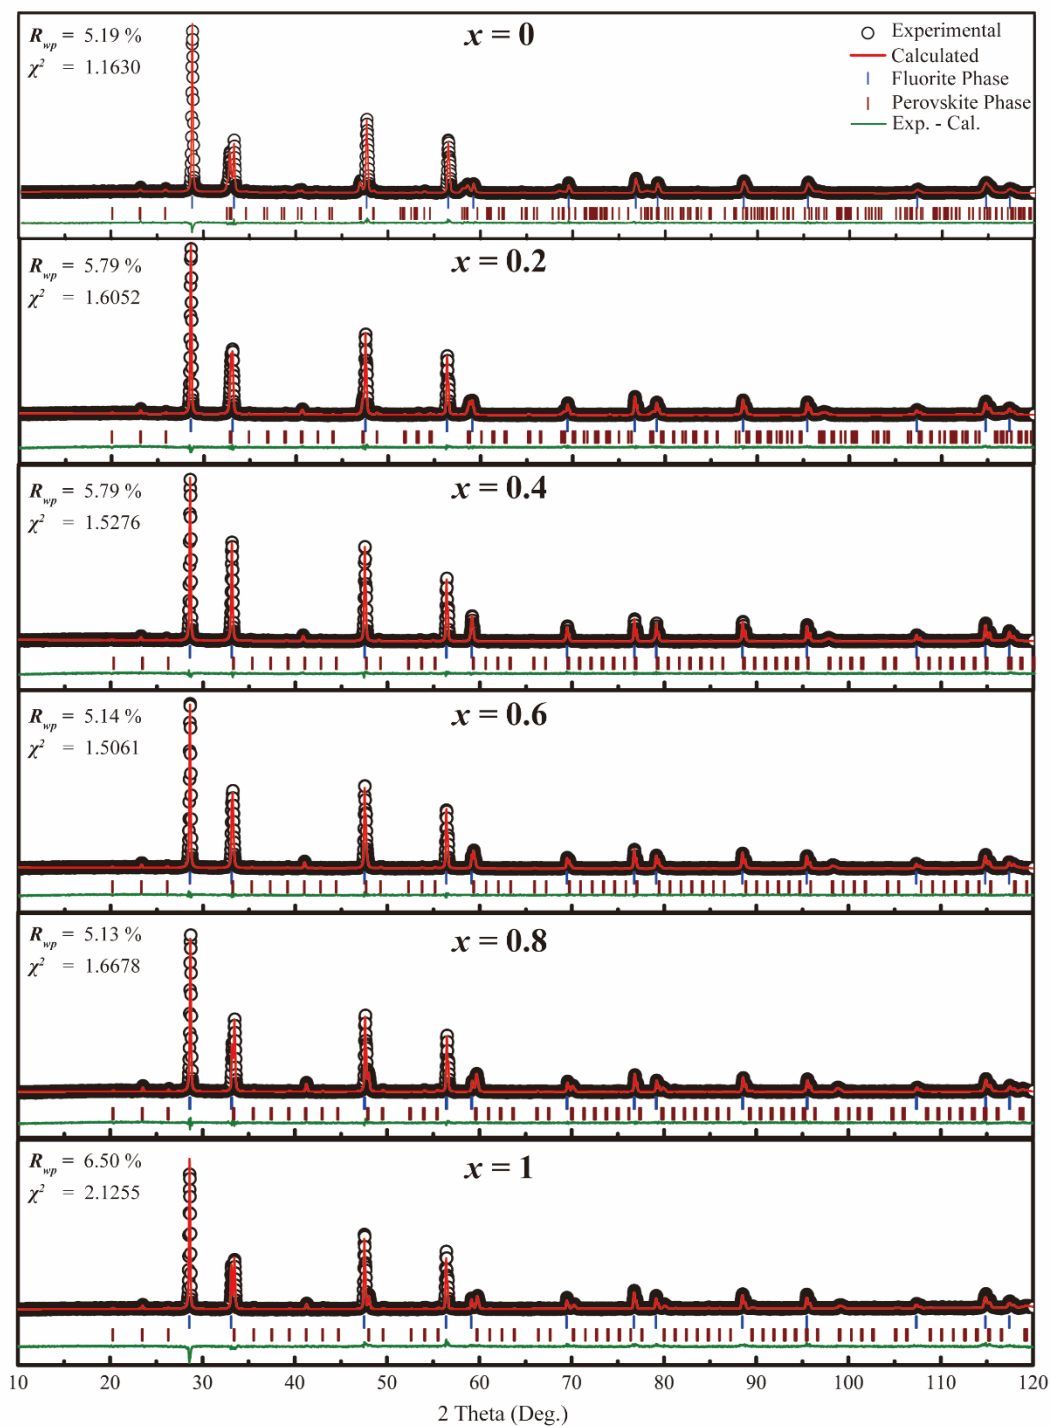

**Fig. S1** the Rietveld refinement pattern of the CPO-PCFCO powder after calcined at 950 °C under the air atmosphere at room temperature

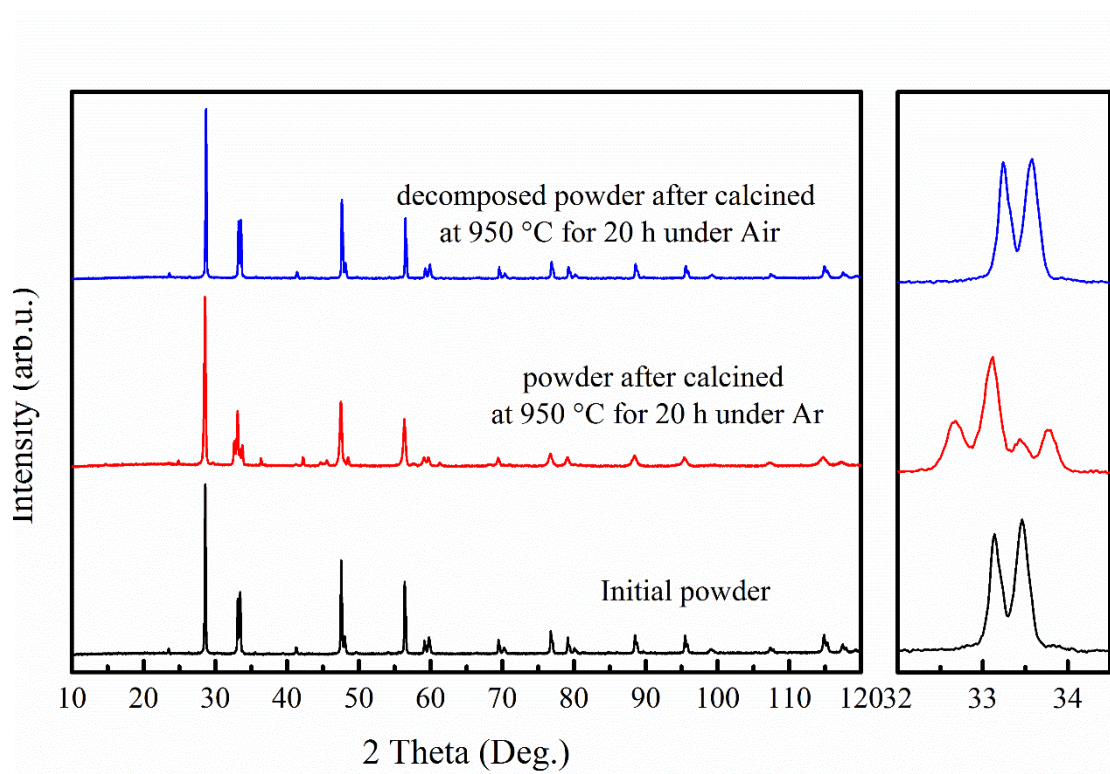

**Fig. S2** The XRD patterns of CPO-PCCO powder before and after calcined at 950 °C for 20 hs under Ar ambient and the decomposed powder after calcined at 950 °C for 20 h under Air ambient.

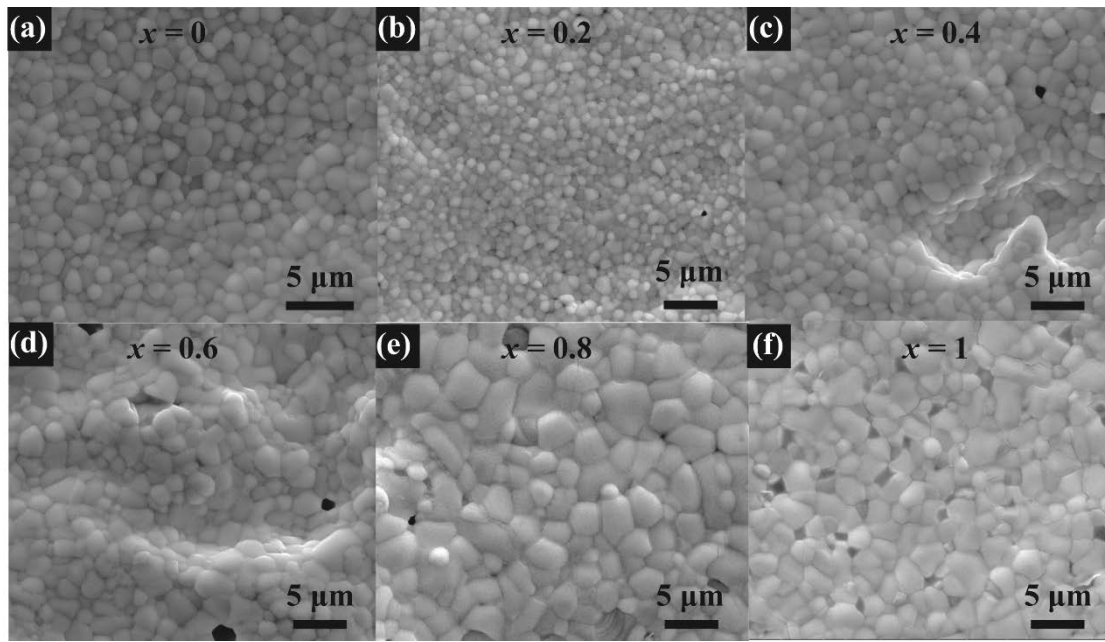

**Fig. S3** The SE images of CPO-PCFCO composite membranes after sintering.

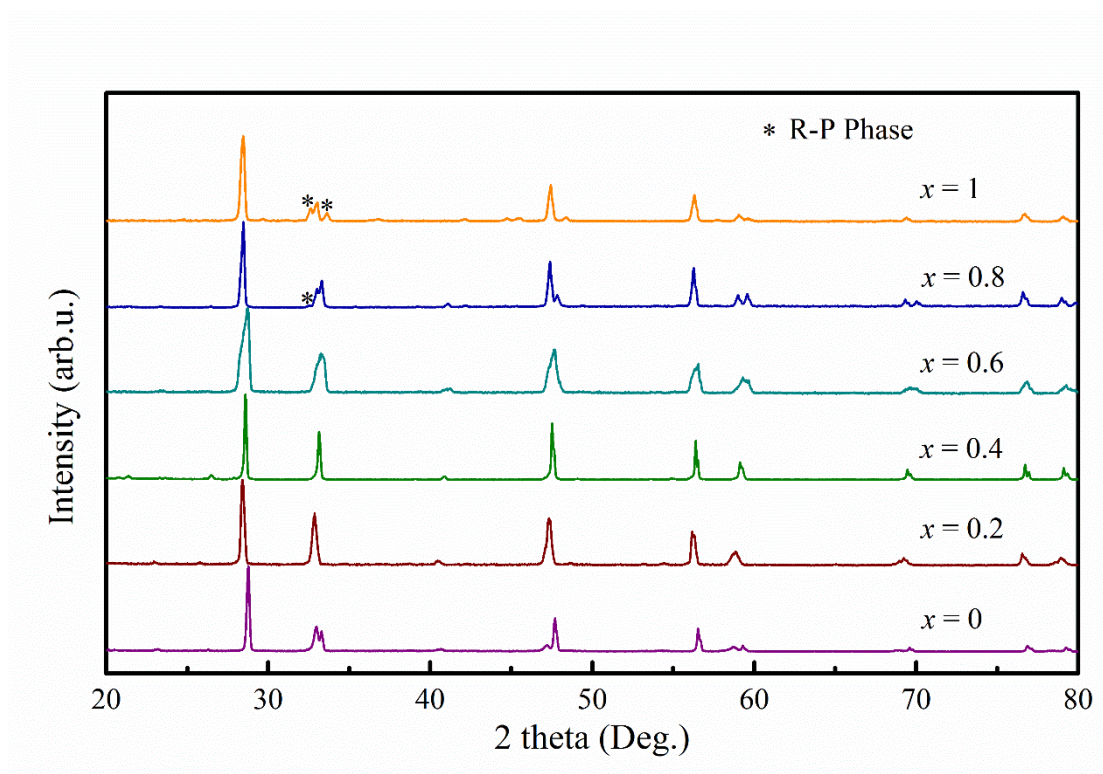

**Fig. S4** The XRD patterns of CPO-PCFCO membranes after sintering.

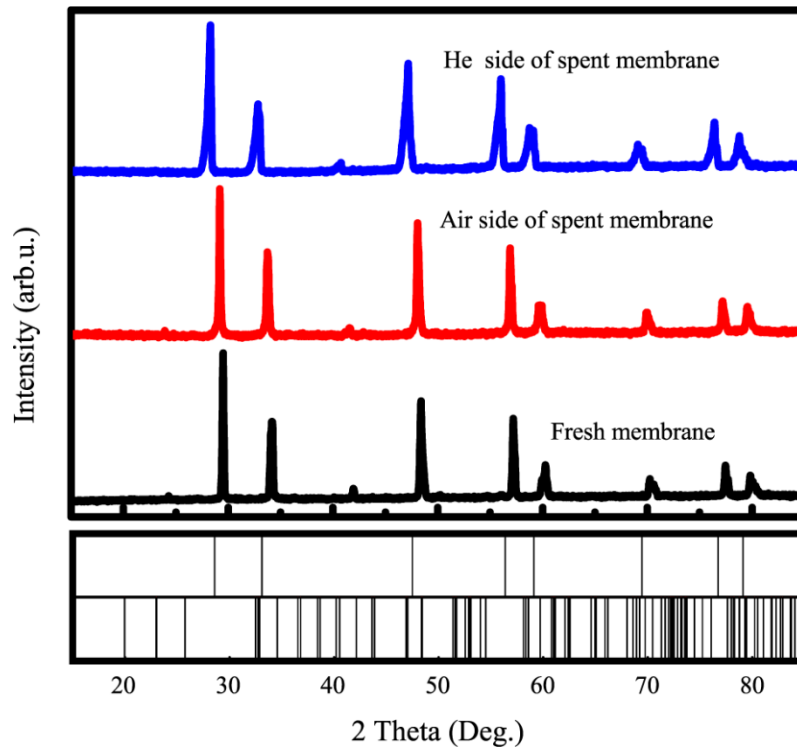

Fig. S5 XRD patterns of fresh and spent  $x = 0.6$  membrane dual phase membrane in the long-term oxygen permeation measurements with pure He as sweep gas.

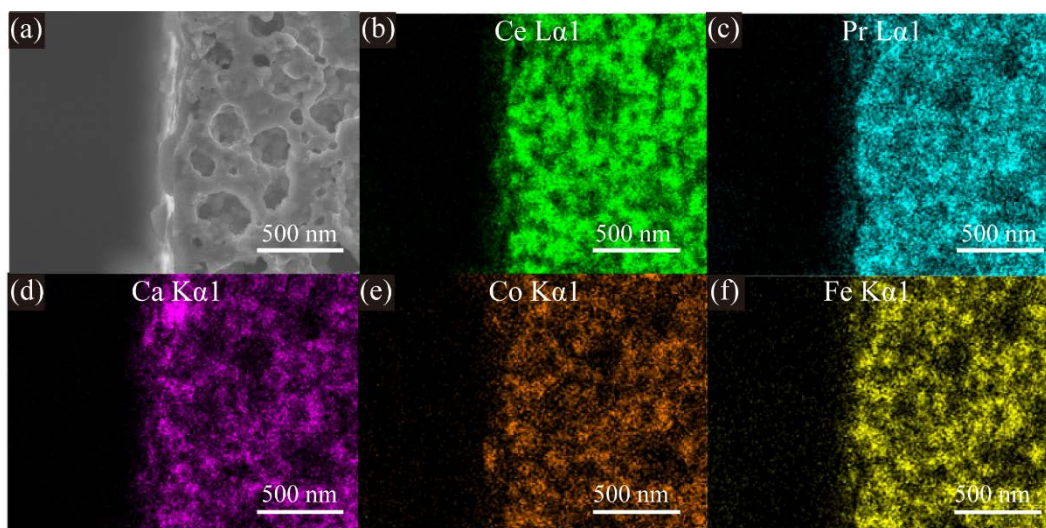

**Fig. S6** EDXS mappings of the cross-section view (the sweep side) of  $x = 0.6$  membrane after long-term CO<sub>2</sub> stability tests.

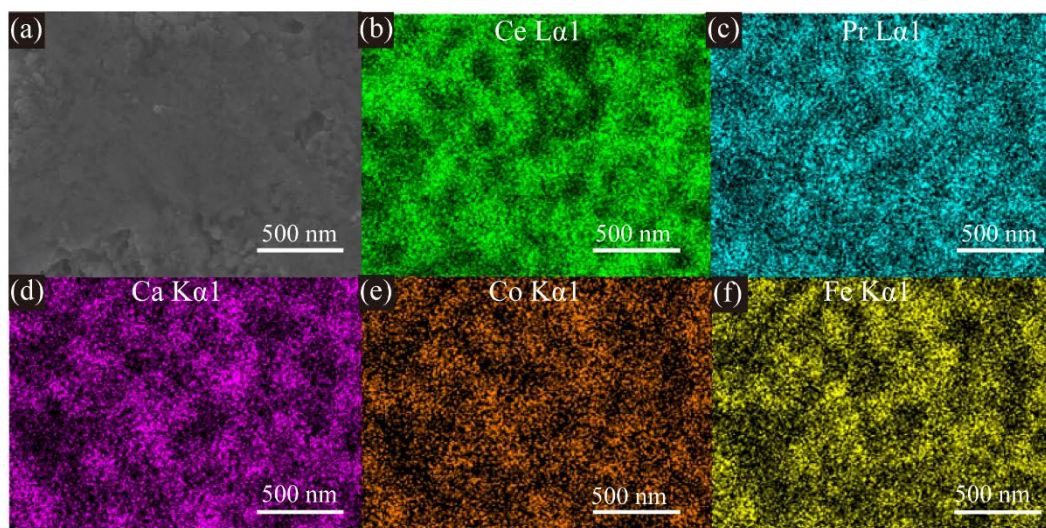

**Fig. S7** EDXS mappings of the plan view (the feed side) of  $x = 0.6$  membrane after long-term  $\text{CO}_2$  stability tests.
